# Supplementary material for: Effect of thiophene S on the enhanced ORR electrocatalytic performance of sulfur-doped graphene quantum dot/reduced graphene oxide nanocomposites
Source: Royal Society of Chemistry journal article supplement (doi:10.1039/c8ra02040j), 2018-01-01
Supplement: c8ra02040j1.pdf [file c8ra02040j1.pdf]

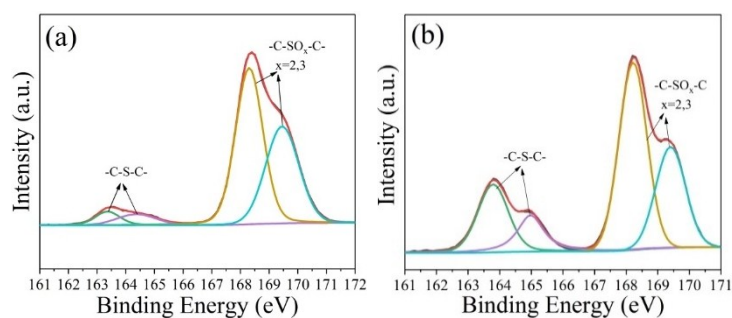

Fig. S1 the peak of deconvolution of S2p core level of S-GQDs-0.12 (a) and S-GQDs-0.63 (b).

In order to better evaluate the electrocatalytic activity of S-GQDs/R-GO samples, the electron transfer number was calculated by the Koutecky-Lecich equations (J s11, s12). This equation is evident for a first-order process with respect to the diffusion species.

Koutecky-Lecich equations:

$$\frac{1}{J} = \frac{1}{B\omega^{1/2}} + \frac{1}{J_k} \quad (1)$$

$$B = 0.2nF(D_{O_2})^{2/3}\nu^{-1/6}C_{O_2} \quad (2)$$

Here J is the current density,  $\omega$  is the electrode rotating rate, n is the electron transfer numbers of S-GQDs/RGO samples in the ORR process, F is the Farady constant ( $F = 96485 \text{ C mol}^{-1}$ ),  $D_{O_2}$  is the diffusion coefficient of  $O_2$  in 0.1 M KOH ( $D_{O_2} = 1.9 \times 10^{-5} \text{ cm}^2 \text{ s}^{-1}$ ),  $\nu$  is the kinematics viscosity for KOH ( $\nu = 0.01 \text{ cm}^2 \text{ s}^{-1}$ ) and  $C_{O_2}$  is concentration of  $O_2$  in the solution ( $D_{O_2} = 1.2 \times 10^{-6} \text{ mol cm}^{-3}$ ). 0.2 is employed when the rotation speed is noted in rpm. The K-L curves are drawn in inset of Fig. 3(b).

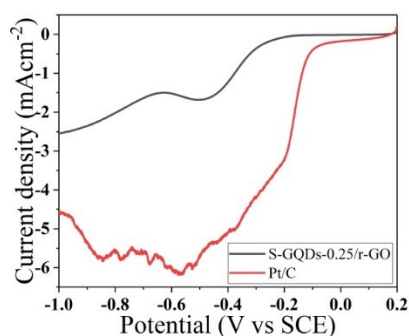

Fig. S2 The LSV of S-GQDs-0.25/r-GO and Pt/C at sweep rate of 5 Mv/s at 1600 rpm in  $O_2$ -saturated 0.1M KOH solution.
